# Supplementary material for: Influence of alcohol consumption and alcohol metabolism variants on breast cancer risk among Black women: results from the AMBER consortium
Source: Springer Nature journal article supplement (doi:10.1186/s13058-023-01660-1), 2023-06-12
Supplement: MOESM2 [file 13058_2023_1660_MOESM2_ESM.pdf]

## Power

We estimated power to detect the main effects of SNPs as well as power to detect gene-environment interaction effects in each phase and the combined meta-analysis assuming an additive genetic model for SNPs with MAF between 0.01-0.25,  $OR_{SNP}$  between 1.5-4.5, odds ratio for the exposure ( $OR_E$ ) of 1.5, and  $OR_{INT}$  between 0.05-0.2, using the *genpwr* R package [1](Figures S1-S2, Additional file 2). In Phase 1, at our most conservative Phase 1 locus-specific significance threshold ( $0.05/\text{number of independent variants per locus}$ ) of  $6.79 \times 10^{-5}$  for the *ADH* region on chromosome 4, given our maximum sample size of 597 cases and 1,250 controls, we have 80% power to detect main genetic effects with an  $OR_{SNP} \geq 1.5$  at  $MAF = 0.22$ . For  $OR_{SNP} \geq 2.5$ , we have 93% power to detect main genetic effects at  $MAF = 0.04$ . In Phase 2, given our maximum sample size of 118 cases and 924 controls, using our most conservative Phase 2 locus-specific significance threshold of  $1.32 \times 10^{-4}$  for the *ADH* region on chromosome 4, we have 86% power to detect main genetic effects with  $OR_{SNP} \geq 2.5$  at  $MAF = 0.12$ . For interaction effects, with a proportion of the population who have the environmental exposure of 20% [2], given our maximum sample size of 715 cases and 2,174 controls,  $\alpha = 0.00015$ ,  $OR_{alcohol} = 1.5$ , and  $OR_{SNP} \geq 2.5$ , we have 80% power to detect  $OR_{INT} = 0.2$  at  $MAF = 0.05$ , and 82% power to detect  $OR_{INT} = 0.1$  at  $MAF = 0.03$ . For  $OR_{SNP} = 1.5$ , holding the other parameters constant, our power to detect  $OR_{INT} = 0.2$  at  $MAF = 0.05$  drops to 64%, and our power to detect to  $OR_{INT} = 0.1$  at  $MAF = 0.03$  drops to 62%.

## Supplemental References

1. Moore CM, Jacobson SA, Fingerlin TE. Power and Sample Size Calculations for Genetic Association Studies in the Presence of Genetic Model Misspecification. *Hum Hered*. 2020;84:256–71.

2. Solomon CA, Laditka SB, Forthofer M, Racine EF. Black-white disparities in alcohol consumption trends among women in the United States, 1990–2015. *J Ethn Subst Abuse*. 2019;20:1–22.

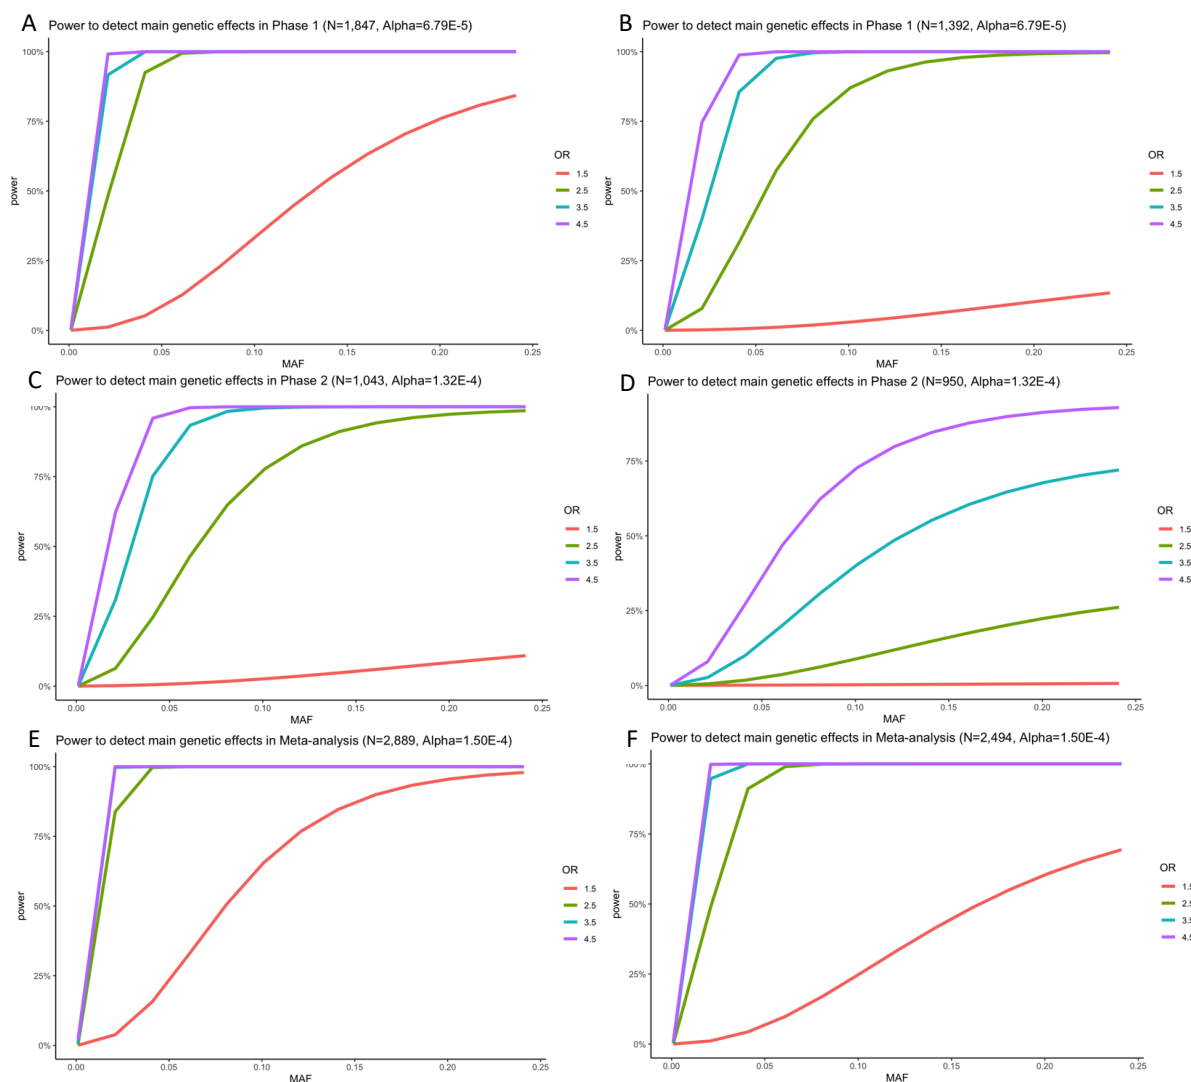

Figure S1. Power to detect main genetic effects (ORs =1.5-4.5) in Phase 1 for samples sizes N=1,847 (Panel A) and N=1,392 (Panel B) at alpha =  $6.79 \times 10^{-5}$ . Power to detect main genetic effects (ORs =1.5-4.5) in Phase 2 for samples sizes N=1,043 (Panel C) and N= 950 (Panel D) at alpha =  $1.32 \times 10^{-4}$ . Power to detect main genetic effects (ORs =1.5-4.5) in meta-analyses for samples sizes N=2,889 (Panel E) and N=2,494 (Panel F) at alpha =  $1.50 \times 10^{-4}$ .

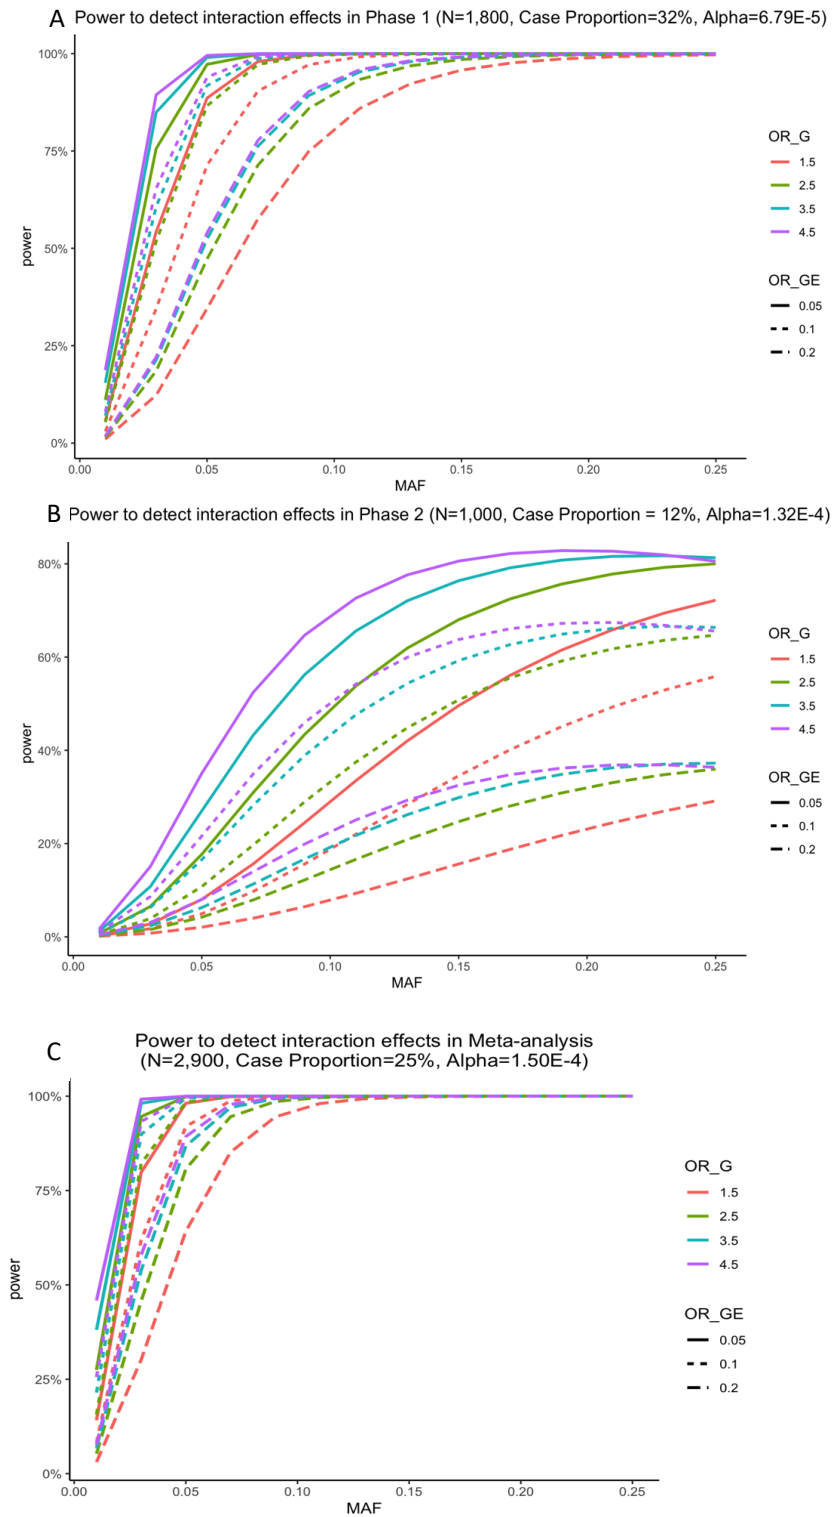

Figure S2. Power to detect interaction effects given main effects ORs =1.5-4.5 and interaction effects=0.05-0.2 in Phase 1 (Panel A: N=1,800, case proportion=32%, at  $\alpha = 6.79 \times 10^{-5}$ ), Phase 2 (Panel B: N=1,000, case proportion = 12%, at  $\alpha = 1.32 \times 10^{-4}$ ), and meta-analysis (Panel C: N=2,900, case proportion = 25%, at  $\alpha = 1.50 \times 10^{-4}$ ).
